# Supplementary material
Source: PubMed Central journal article supplement (PMC2587504)

Supplementary Fig. 1

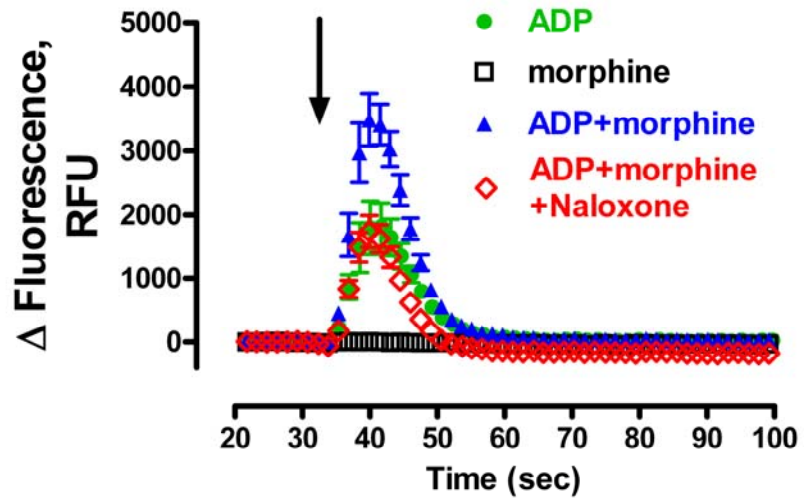

Supplement: NIHMS63400-supplement-01.pdf [file NIHMS63400-supplement-01.pdf]
